# Supplementary material for: Overcoming the lack of authentic standards for the quantification of biogenic secondary organic aerosol markers
Source: Royal Society of Chemistry journal article supplement (doi:10.1039/d2ea00074a), 2022-12-14
Supplement: d2ea00074a2.xlsx [file d2ea00074a2.xlsx]

## Sheet: Table S1
Compound	Formula	SMILE	RT	Functionality	logRIEM	logRIEP	Purity	Manufacturer
2,6 dimethyl-4-nitrophenol	C8H9NO3	CC1=CC(=CC(=C1O)C)[N+](=O)[O-]	12.71	-OH	1.75	0.33	98	Sigma
4-nitro-1-naphthol	C10H7NO3	C1=CC=C2C(=C1)C(=CC=C2O)[N+](=O)[O-]	14.99	-OH	1.75	1.17	98	TCI Chemicals
2-methyl-4-nitrophenol	C7H7NO3	CC1=C(C=CC(=C1)[N+](=O)[O-])O	10.42	-OH	1.72	1.39	97	Sigma
Isoborneolacetic acid	C13H22O3	CC1(C2(CCC1(C(C2CC(=O)O)O)C)C)C	14.87	-OOH	1.62	0.81	99	Sigma
2-fluro nitrophenol	C6H4FNO3	C1=CC(=C(C=C1[N+](=O)[O-])F)O	7.16	-OH	1.6	1.22	99	fluorochem
3-methyl-4-nitrophenol	C7H7NO3	CC1=C(C=CC(=C1)O)[N+](=O)[O-]	9.3	-OH	1.57	1.43	99	fluorochem
Sebacic acid	C10H18O4	C(CCCCC(=O)O)CCCC(=O)O	13.14	-OOH	1.46	1.15	99	Sigma
4-nitrocatechol	C6H5NO4	C1=CC(=C(C=C1[N+](=O)[O-])O)O	4.76	-OH	1.36	1.03	96	Sigma
4-nitrobenzene-1,3-diol	C6H5NO4	C1=CC(=C(C=C1O)O)[N+](=O)[O-]	6.73	-OH	1.34	0.31	95	Fluorochem
Azelaic acid	C9H16O4	C(CCCC(=O)O)CCCC(=O)O	10.51	-OH	1.33	1.25	98	Sigma
2-methyl-5-nitrophenol	C7H7NO3	CC1=C(C=C(C=C1)[N+](=O)[O-])O	11	-OH	1.33	1.34	98	Sigma
2-methyl-3-nitrophenol	C7H7NO3	CC1=C(C=CC=C1O)[N+](=O)[O-]	9.77	-OH	1.31	1.08	98	Fluorochem
2,4-dinitrophenol	C6H4N2O5	C1=CC(=C(C=C1[N+](=O)[O-])[N+](=O)[O-])O	7.42	-OH	1.3	0.4	98	Sigma
Suberic acid	C8H14O4	C(CCCC(=O)O)CCC(=O)O	7.56	-OH	1.29	0.94	98	Sigma
4-hydroxybenzaldehyde	C7H6O2	C1=CC(=CC=C1C=O)O	4.2	-CHO/-OH	1.26	0.39	98	Alfa Aesar
3-nitrophenol	C6H5NO3	C1=CC(=CC(=C1)O)[N+](=O)[O-]	9.89	-OH	1.23	1.12	99	Thermo Sci
4-methyl-3-nitrophenol	C7H7NO3	CC1=C(C=C(C=C1)O)[N+](=O)[O-]	9.89	-OH	1.23	1.34	97	Fluorochem
Camphoric acid	C10H16O4	CC1(C(CCC1(C)C(=O)O)C(=O)O)C	9.04	-OOH	1.2	0.9	98	Alfa Aesar
2-Hydroxyhexanoic acid	C6H12O3	CCCCC(C(=O)O)O	5.68	-OOH	1.14	0.32	95	*
3,3-dimethyl glutaric acid	C9H16O4	CC(C)(CC(=O)O)CC(=O)O	4.43	-OOH	1.13	0.65	98	Sigma
p-coumaric acid	C9H8O3	C1=CC(=CC=C1C=CC(=O)O)O	6.4	-OOH	1.13	0.8	98	Sigma
2,3-napthalenedicarboxylic acid	C12H6O3	O=C(O)C1CC2CCCCC2(CC1(C(=O)O))	10.68	-CO	1.03	0.75	95	Sigma
2-hydroxy-3-methylbutyric acid	C5H10O3	CC(C)C(C(=O)O)O	2.39	-OOH	1.01	-0.07	99	Sigma
Pimelic acid	C7H12O4	C(CCC(=O)O)CCC(=O)O	4.63	-OOH	0.92	0.8	98	Thermo Sci
Isophthalic acid	C8H6O4	C1=CC(=CC(=C1)C(=O)O)C(=O)O	6.24	-OOH	0.92	0.62	95	*
Citraconic acid	C5H6O4	CC(=CC(=O)O)C(=O)O	1.17	-OOH	0.91	0.34	98	Sigma
2,5-dihydroxybenzoic acid	C7H6O4	C1=CC(=C(C=C1O)C(=O)O)O	2.91	-OOH	0.91	0.42	95	*
2-Methoxy-4-nitrophenol	C7H7NO4	COC1=C(C=CC(=C1)[N+](=O)[O-])O	7.61	-OH	0.91	0.19	97	Sigma
Cholic acid	C24H40O5	CC(CCC(=O)O)C1CCC2C1(C(CC3C2C(CC4C3(CCC(C4)O)C)O)O)C	20.4	-OOH	0.91	0.88	95	*
Diphenolic acid	C17H18O4	CC(CCC(=O)O)(C1=CC=C(C=C1)O)C2=CC=C(C=C2)O	11.52	-OOH	0.87	0.91	95	Sigma
1,2,4-Butanetricarboxylic acid	C7H10O6	C(CC(=O)O)C(CC(=O)O)C(=O)O	1.23	-OOH	0.8	0.45	97	Activate Scientific
3,4-Dihydroxy benzoic acid	C7H6O4	C1=CC(=C(C=C1C(=O)O)O)O	1.82	-OOH	0.77	0.58	97	Sigma
Sinapic acid	C11H12O5	COC1=CC(=CC(=C1O)OC)C=CC(=O)O	7.85	-OOH	0.76	0.52	98	Santa Cruz Biotechnology
Adipic acid	C6H10O4	C(CCC(=O)O)CC(=O)O	2.33	-OOH	0.75	0.69	99	Sigma
Levulinic acid	C5H8O3	CC(=O)CCC(=O)O	1.22	-OOH	0.72	-0.58	98	Sigma
Hippuric acid	C9H9NO3	C1=CC=C(C=C1)C(=O)NCC(=O)O	3.57	-OOH	0.63	0.82	98	Thermo Sci
3-methyl adipic acid	C7H12O4	CC(CCC(=O)O)CC(=O)O	4.54	-OOH	0.62	0.8	95	*
Succinic acid	C4H6O4	C(CC(=O)O)C(=O)O	0.97	-OOH	0.6	0.5	99	Sigma
3-nitrobenzoic acid	C7H5NO4	C1=CC(=CC(=C1)[N+](=O)[O-])C(=O)O	7.53	-OOH	0.59	0.79	95	*
1,4-cyclohexanedicarboxylic acid	C8H12O4	C1CC(CCC1C(=O)O)C(=O)O	5.83	-OOH	0.58	0.88	99	Sigma
Glutaric acid	C5H8O4	C(CC(=O)O)CC(=O)O	1.31	-OOH	0.57	0.75	99	Sigma
4-methyl-catechol	C7H8O2	CC1=CC(=C(C=C1)O)O	4.65	-OH	0.56	0.44	95	*
4-hydroxy benzoic acid	C7H6O3	C1=CC(=CC=C1C(=O)O)O	3.38	-OOH	0.5	0.62	99	Sigma
2-Methylsuccinic acid	C5H8O4	CC(CC(=O)O)C(=O)O	1.76	-OOH	0.49	0.55	95	*
3-hydroxy benzoic acid	C7H6O3	C1=CC(=CC(=C1)O)C(=O)O	4.42	-OOH	0.41	0.42	95	*
Itaconic acid	C5H6O4	C=C(CC(=O)O)C(=O)O	1.48	-OOH	0.39	0.55	95	*
Malic acid	C4H6O5	C(C(C(=O)O)O)C(=O)O	0.72	-OOH	0.3	-0.2	99	Sigma
Citric acid	C6H8O7	C(C(=O)O)C(CC(=O)O)(C(=O)O)O	0.93	-OOH	0.28	0.45	95	*
Mandelic acid	C8H8O3	C1=CC=C(C=C1)C(C(=O)O)O	3.33	-OOH	0.27	0.55	99	Thermo Sci
Maleic acid	C4H4O4	C(=CC(=O)O)C(=O)O	0.75	-OOH	0.26	0.47	99	Sigma
trans,trans,1,3-butadiene-	C6H6O4	C(=CC(=O)O)C=CC(=O)O	2.11	-OOH	0.19	0.63	95	*
1,4-dicarboxylic acid
DL-tartaric acid	C4H6O6	C(C(C(=O)O)O)(C(=O)O)O	0.72	-OOH	0.15	-0.25	95	*
Shikimic acid	C7H10O5	C1C(C(C(C=C1C(=O)O)O)O)O	0.74	-OOH	0.1	0.29	98	Alfa Aesar
O-toluic acid	C8H8O2	CC1=CC=CC=C1C(=O)O	10.74	-OOH	0.1	-0.62	99	Sigma
Vanillin	C8H8O3	COC1=C(C=CC(=C1)C=O)O	5.55	-CHO/-OH	0.09	0.05	99	Thermo Sci
4-nitrocinnamic acid	C9H7NO4	C1=CC(=CC=C1C=CC(=O)O)[N+](=O)[O-]	10.97	-OOH	0.03	0	95	*
Nonanoic acid	C9H18O2	CCCCCCCCC(=O)O	19.46	-OOH	-0.11	-0.32	97	Alfa Aesar
Dodecanoic acid	C12H24O2	CCCCCCCCCCCC(=O)O	23.62	-OOH	-0.14	-0.51	98	Sigma
Benzoic acid	C7H6O2	C1=CC=C(C=C1)C(=O)O	7.93	-OOH	-0.19	-0.7	99.5	Sigma
Methylmalonic acid	C4H6O4	CC(C(=O)O)C(=O)O	1.05	-OOH	-0.21	-0.89	95	*
Vanillic acid	C8H8O4	COC1=C(C=CC(=C1)C(=O)O)O	4.34	-OOH	-0.25	1.02	95	*
2-nitro-1-naphthol	C10H7NO3	C1=CC=C2C(=C1)C=CC(=C2O)[N+](=O)[O-]	18.83	-OH	-0.34	-0.48	95	Sigma
m-toluic acid	C8H8O2	CC1=CC(=CC=C1)C(=O)O	11.42	-OOH	-0.38	-0.47	99	Sigma
2-nitroresorcinol	C6H5NO4	C1=CC(=C(C(=C1)O)[N+](=O)[O-])O	5.41	-OH	-0.4	-0.49	98	Sigma
Valeric acid	C5H10O2	CCCCC(=O)O	2.31	-OOH	-0.46	-1.1	99	Sigma
p-toluic acid	C8H8O2	CC1=CC=C(C=C1)C(=O)O	11.45	-OOH	-0.47	-0.95	98	Sigma
2-nitrobenzoic acid	C7H5NO4	C1=CC=C(C(=C1)C(=O)O)[N+](=O)[O-]	2.94	-OOH	-0.49	0.15	95	*
2-nitrophenol	C6H5NO3	C1=CC=C(C(=C1)[N+](=O)[O-])O	10.84	-OH	-0.54	-0.6	98	*
pyruvic acid	C3H4O3	CC(=O)C(=O)O	0.78	-OOH	-0.57	-1.6	98	Sigma
4-methoxy-benzoic acid	C8H8O3	COC1=CC=C(C=C1)C(=O)O	9.09	-OOH	-0.57	-0.02	95	*
5-methyl-2-nitrophenol	C7H7NO3	CC1=CC(=C(C=C1)[N+](=O)[O-])O	12.92	-OH	-0.59	-0.01	97	Sigma
DL-isoleucine	C6H13NO2	CCC(C)C(C(=O)O)N	0.99	-OOH	-0.64	-0.49	95	*
Trans-cinnamic acid	C9H8O2	C1=CC=C(C=C1)C=CC(=O)O	11.76	-OOH	-0.67	-0.5	98	Sigma
Malonic acid	C3H4O4	C(C(=O)O)C(=O)O	0.76	-OOH	-0.7	-0.54	99	Sigma
4-methyl-2-nitrophenol	C7H7NO3	CC1=CC(=C(C=C1)O)[N+](=O)[O-]	12.86	-OH	-0.75	0.03	99	Sigma
2-methyl-6-nitrophenol	C7H7NO3	CC1=C(C(=CC=C1)[N+](=O)[O-])O	14.54	-OH	-0.75	-0.58	98	Fluorochem
4-methoxy-2-nitrophenol	C7H7NO4	COC1=CC(=C(C=C1)O)[N+](=O)[O-]	11.75	-OH	-0.76	-0.47	98	Sigma
4-Phenylbutyric acid	C10H12O2	C1=CC=C(C=C1)CCCC(=O)O	13.37	-OOH	-0.77	-0.65	95	*
Acetoxyacetic acid	C4H6O4	CC(=O)OCC(=O)O	1.17	-OOH	-0.78	-0.05	99	Sigma
Ketopinic acid	C10H14O3	CC1(C2CCC1(C(=O)C2)C(=O)O)C	8.66	-OOH	-0.85	-0.38	99	Sigma
3,4-dimethyl-benzoic acid	C9H10O2	CC1=C(C=C(C=C1)C(=O)O)C	14.14	-OOH	-1.03	-0.67	95	*
Furoic acid	C5H4O3	C1=COC(=C1)C(=O)O	3.21	-OOH	-1.23	-0.93	98	Apollo Scientific
4-hydroxycinnamic acid	C9H8O3	C1=CC(=CC=C1C=CC(=O)O)O	6.38	-OOH	-1.29	-0.48	95	*
Aconitic acid	C6H6O6	C(C(=CC(=O)O)C(=O)O)C(=O)O	1	-OOH	-1.39	0.49	98	Thermo Sci
Crotonic acid	C4H6O2	CC=CC(=O)O	1.05	-OOH	-1.76	-1.92	95	*
Sorbic acid	C6H8O2	CC=CC=CC(=O)O	7.88	-OOH	-1.8	-0.96	95	*
Phenyl acetic acid	C8H8O2	C1=CC=C(C=C1)CC(=O)O	4.96	-OOH	-2.09	-0.7	95	*
Butyric acid	C4H8O2	CCCC(=O)O	3.16	-OOH	-2.34	-1.33	99	Sigma
3,3-dimethyl acrylic acid	C5H8O2	CC(=CC(=O)O)C	5.04	-OOH	-2.84	-1.38	95	*
